# Supplementary material for: A highly diverse microcosm in a hostile world: a review on the associates of red wood ants (Formica rufa group)
Source: Springer Nature journal article supplement (doi:10.1007/s00040-014-0357-3), 2014-07-02
Supplement: MOESM1 [file 40_2014_357_MOESM1_ESM.pdf]

## Supplementary Tables

**Supplementary Table 1. Myrmecophiles associated with red wood ants (*F. rufa* group). Host ant: \* indicates primary host of myrmecophile are RWAs (as mentioned in at least one reference in right column or when the myrmecophile have hitherto only been found with RWAs). RWA species are underlined, primary host in bold when known. Abbreviations and taxonomy of host ant see table 3. Host ant: all known host ants reported in references on the right. Taxonomic relation: based on list of host ants. Biology: I = inside nest, E = outside nest, A = alternating life cycle with larval stage inside mound, and adult stage extranidal, D = different summer and winter host, P = larva parasitic inside ant worker or ant larva. Names of species of the *F. rufa* group correspond to the original species name given in the reference.**

| Myrmecophile                                                | Host ant                                                                                                                  | Taxonomic relation host ants | Biology | References                |
|-------------------------------------------------------------|---------------------------------------------------------------------------------------------------------------------------|------------------------------|---------|---------------------------|
| <b>ACARI</b>                                                |                                                                                                                           |                              |         |                           |
| <b>→MESOSTIGMATA</b>                                        |                                                                                                                           |                              |         |                           |
| <i>Androlaelaps myrmecophila</i> (Evans and Till, 1966)     | * <u><i>Fprat Frufa Frufa</i></u>                                                                                         | <i>F. rufa</i> group         | I       | 10, 31, 40                |
| <i>Hypoaspis cuneifer</i> Michael 1891                      | <i>Caeth Cherc Clign Fcuni Fexse Ffusc Frufa Frufib Fsang Lalie Lbrun Lflav Lfuli Lmixt Lumbr Mscab Ppall Sfuga Terra</i> | Formicidae                   | I       | 1, 2, 4, 5, 6, 10, 18, 32 |
| <i>Hypoaspis montana</i> Berlese, 1904                      | <i>Ffusc Frufa Lnige Myrmica</i>                                                                                          | Formicidae                   | I       | 5, 10, 40                 |
| <i>Hypoaspis myrmecophila</i> (Berlese, 1892)               | <i>Aphaenogaster Clign Fcuni Frufa Frufib Fsang Lflav Lnige MSbarb Mlaev Mrubr Mrugi Mscab Messor</i>                     | Formicidae                   | I       | 1, 2, 4, 5, 6, 10, 18     |
| <i>Hypoaspis neocuneifer</i> (Evans and Till, 1966)         | * <u><i>Frufa</i></u>                                                                                                     | <i>F. rufa</i> group         | I       | 10, 40                    |
| <i>Hypoaspis oophila</i> (Wasmann 1897)                     | <i>Fcuni Ffusc Epoly Fprat Frufa Frufib Fsang</i>                                                                         | <i>Formica</i>               | I       | lives on the eggs         |
| <i>Laelaps laevis</i> Michael, 1891                         | <u><i>Fprat Frufib Fsang Mbarb Tcaes</i></u>                                                                              | Formicidae                   | I       | 4, 5, 32                  |
| <i>Myrmozercon acuminatus</i> Berlese, 1903                 | <u><i>Frufa MScapi</i></u>                                                                                                | Formicidae                   | I       | 5, 32                     |
| <b>RHODACARIDAE</b>                                         |                                                                                                                           |                              |         |                           |
| <i>Punctodendrolaelaps formicarius</i> Hugta and Karg, 2010 | * <u><i>Frufa</i></u> s.l.                                                                                                | <i>F. rufa</i> group         | I       | 31                        |
| <b>TRACHYTIDAE</b>                                          |                                                                                                                           |                              |         |                           |
| <i>Uroseius myrmecophilus</i> Wisniewski 1979               | * <u><i>Fpoly</i></u>                                                                                                     | <i>F. rufa</i> group         | I       | 32                        |
| <b>TRACHYUROPODIDAE</b>                                     |                                                                                                                           |                              |         |                           |
| <i>Urojanetia coccinea</i> (Michael, 1891)                  | <i>Fexse Ffusc Epoly Frufa Frufib Fsang Lnige Lflav Mrubr Mscab</i>                                                       | Formicidae                   | I       | 4, 5, 17, 32              |
| <i>Urojanetia coccinea</i> var. <i>sinuate</i>              | <i>Atest Caeth Ffusc Frufa Frufib Fsang Lflav Lnige Mscab</i>                                                             | Formicidae                   | I       | 5, 32                     |
| <b>URODINYCHIDAE</b>                                        |                                                                                                                           |                              |         |                           |
| <i>Urodinychus janeti</i> Berlese, 1904                     | ? <i>Ffusc Frufa</i>                                                                                                      | <i>Formica</i>               | I       | 5                         |
| <b>UROPODIDAE</b>                                           |                                                                                                                           |                              |         |                           |
| <i>Oodinychus ovalis</i> (C.L. Koch, 1839)                  | <i>Camponotus Formica Lasius</i>                                                                                          | Formicinae                   | I       | 17                        |
| <i>Oplitis pandata</i> (Michael, 1894) ssp. n. "A"          | ? <i>Fexse Frufa</i>                                                                                                      | Formicamound                 | I       | 17                        |
| <i>Trematurella elegans</i> (Berlese, 1916)                 | ? <u><i>Epoly Lnige</i></u>                                                                                               | Formicinae                   | I       | 17                        |

|                                                        |                                                        |                      |   |                                     |                             |
|--------------------------------------------------------|--------------------------------------------------------|----------------------|---|-------------------------------------|-----------------------------|
| <i>Urodiscella ricasoliana</i> (Berlese, 1889)         | <i>Clign Frufa Lfuli Lumbr</i>                         | Formicinae           | I |                                     | 5, 6                        |
| <i>Uroseius koehleri</i> Wisniewski, 1979              | * <i>Frufa</i>                                         | <i>F. rufa</i> group | I |                                     | 17                          |
| <b>→ SARCOPTIFORMES</b>                                |                                                        |                      |   |                                     |                             |
| ACARIDAE                                               |                                                        |                      |   |                                     |                             |
| <i>Forcellinia wasmanni</i> (Monniez, 1892)            | <i>Ffusc Frufa Fsang Lalie Lfuli Lnige Mrugi Tcaes</i> | Formicidae           | I |                                     | 6                           |
| <i>Tyrophagus formicetorum</i> Volgin, 1948            | * <i>Frufa</i>                                         | <i>F. rufa</i> group | I |                                     | 16                          |
| <b>→ TROMBIDIFORMES</b>                                |                                                        |                      |   |                                     |                             |
| NANORCHESTIDAE                                         |                                                        |                      |   |                                     |                             |
| <i>Speleorchestes formicorum</i> Trägårdh, 1909        | * <i>Frufa</i>                                         | <i>F. rufa</i> group | I |                                     | 5                           |
| PYGMEPHORIDAE                                          |                                                        |                      |   |                                     |                             |
| <i>Petalomium sawtschuki</i> (Sevastianov, 1967)       | * <i>Frufa</i>                                         | <i>F. rufa</i> group | I |                                     | 13                          |
| <i>Pygmephorus samsinaki</i> Mahunka, 1967             | * <i>Frufa</i>                                         | <i>F. rufa</i> group | I |                                     | 12                          |
| <i>Siteroptes bohemicus</i> Mahunka, 1967              | * <i>Frufa</i>                                         | <i>F. rufa</i> group | I |                                     | 12                          |
| SCUTACARIDAE                                           |                                                        |                      |   |                                     |                             |
| <i>Disparipes nudus</i> Berlese, 1886                  | ? <i>Lfuli Frufa</i>                                   | Formicinae           | I |                                     | 1                           |
| <i>Imparipes atypicus</i> Karafiat, 1959               | ? <i>Frufa Mrugi</i>                                   | Formicidae           | I | phoretic                            | 9, 15                       |
| <i>Imparipes pennatus</i> Karafiat, 1959               | ? <i>Frufa Terra</i>                                   | Formicidae           | I | phoretic                            | 9                           |
| <i>Scutacarus rotundatus</i> (Berlese, 1903)           | ? <i>Frufa Lnige</i>                                   | Formicinae           | I |                                     | 6                           |
| <b>ARANEA</b>                                          |                                                        |                      |   |                                     |                             |
| AGELENIDAE                                             |                                                        |                      |   |                                     |                             |
| <i>Mastigusa arietina</i> (Thorell, 1871)              | <i>Ffusc Fpoly Frufa Lfuli Lbrun Lumbr</i>             | Formicinae           | I |                                     | 1, 5, 44, 45                |
| CORINNIDAE                                             |                                                        |                      |   |                                     |                             |
| <i>Phrurolithus festivus</i> (C.L.Koch, 1835)          | <i>Ffusc Frufa Fsang Lbrun Lflav Lfuli Lnige</i>       | Formicinae           |   | mimicry                             | 1, 5                        |
| GNAPHOSIDAE                                            |                                                        |                      |   |                                     |                             |
| <i>Micaria fulgens</i> (Walckenaer, 1802)              | ? <i>Frufa</i>                                         | <i>F. rufa</i> group |   | mimicry                             | 2                           |
| LINYPHIIDAE                                            |                                                        |                      |   |                                     |                             |
| <i>Acartauchenius scurrilis</i> (O.P.-Cambridge, 1872) | <i>Tcaes Frufa Lflav</i>                               | Formicidae           | I |                                     | 1, 2, 5, 45                 |
| <i>Thyreosthenius biovatus</i> (O. P.-Cambridge, 1875) | * <i>Ffusc Fluqu Fpoly Fprat Frufa</i>                 | <i>Formica</i>       | I |                                     | 1, 2, 5, 19, 40, 41, 44, 45 |
| SALTICIDAE                                             |                                                        |                      |   |                                     |                             |
| <i>Myrmarachne formicaria</i> (de Geer 1778)           | <i>Mrubr Mscab Fcuni Frufa Frufib</i>                  | Formicidae           | E | mimicry                             | 5                           |
| THERIDIIDAE                                            |                                                        |                      |   |                                     |                             |
| <i>Dipoena torva</i> (Thorell, 1875)                   | * <i>Faquii Fpoly</i>                                  | <i>F. rufa</i> group | E | myrmecophagous                      | 20, 33                      |
| <i>Dipoena tristis</i> (Hahn, 1833)                    | <i>Ffusc Frufa Fsang Frufib</i>                        | <i>Formica</i>       | E | myrmecophagous                      | 3                           |
| <b>COLLEMBOLA</b>                                      |                                                        |                      |   |                                     |                             |
| <i>Cyphoderus albinus</i> Nicolet, 1842                | Panmyrmecophilous                                      | Formicidae           | I | loss of pigment, blind              | 1, 5, 26, 40, 41, 45        |
| <b>ISOPODA</b>                                         |                                                        |                      |   |                                     |                             |
| <i>Platyarthrus hoffmannseggii</i> Brandt, 1833        | panmyrmecophilous                                      | Formicidae           | I | loss of pigment, blind              | 1, 5, 7, 26, 40, 41, 45     |
| <b>ZYGENTOMA</b>                                       |                                                        |                      |   |                                     |                             |
| <i>Atelura formicaria</i> Heyden, 1855                 | Panmyrmecophilous                                      | Formicidae           | I | loss of pigment, blind trophallaxis | 1, 2, 18, 45                |
| <b>COLEOPTERA</b>                                      |                                                        |                      |   |                                     |                             |
| CETONIIDAE                                             |                                                        |                      |   |                                     |                             |
| <i>Protaetia (Potosia) metallica</i> (Herbst, 1782)    | * <i>Fpoly Fprat Frufa Fural Fsang Lfuli</i>           | Formicinae           | A | larva though skin                   | 1,5,24, 38, 41, 45          |

|                                                         |   |                                                                                                                                |                      |                                                                            |                                      |
|---------------------------------------------------------|---|--------------------------------------------------------------------------------------------------------------------------------|----------------------|----------------------------------------------------------------------------|--------------------------------------|
| COCCINELLIDAE                                           |   |                                                                                                                                |                      |                                                                            |                                      |
| <i>Coccinella magnifica</i> Redtenbacher, 1843          | * | <u>Flugu Fpoly Fprat Frufa</u>                                                                                                 | <i>F. rufa</i> group | E feeds on aphids colonies tended by rwas / trail following / ducking down | 5, 19, 41, 45                        |
| CHRYSOMELIDAE                                           |   |                                                                                                                                |                      |                                                                            |                                      |
| <i>Clytra laeviuscula</i> Ratzeburg, 1837               |   | <i>Asubt Frufa Fsang Lalie Lnige</i>                                                                                           | Formicidae           | A larva in case                                                            | 1, 5, 39                             |
| <i>Clytra quadripunctata</i> (Linnaeus, 1758)           | * | <i>Clign Faqui Fexse Ffusc Flugu Frufa F.prat Fsang Fgaga</i>                                                                  | Formicidae           | A larva in case                                                            | 1, 5, 19, 24, 39, 41, 45             |
| CRYPTOPHAGIDAE                                          |   |                                                                                                                                |                      |                                                                            |                                      |
| <i>Emphylus glaber</i> (Gyllenhal, 1808)                | * | <i>Faqui Fpoly Frufa Fural</i>                                                                                                 | Formicamound         | I                                                                          | 1, 3, 24, 44                         |
| <i>Hypocoprus latridioides</i> Motschulsky, 1839        |   | <b>Fexse Flugu Fobsc Frufa</b>                                                                                                 | Formicamound         | I                                                                          | 1, 39                                |
| HISTERIDAE                                              |   |                                                                                                                                |                      |                                                                            |                                      |
| <i>Abraeus perpusillus</i> (Marsham, 1802)              |   | <i>Lfuli Lbrun Frufa</i>                                                                                                       | Formicinae           | I                                                                          | 24                                   |
| <i>Dendrophilus pygmaeus</i> (Linnaeus, 1758)           | * | <i>Faqui Fexse Flugu Fpoly Fprat FrufaLfuli</i>                                                                                | Formicinae           | I death feigning                                                           | 1, 5, 14, 19, 21, 24,39, 41, 44, 45  |
| <i>Hetaerius ferrugineus</i> (Olivier, 1789)            |   | <i>Formica Fcine Fexse Ffusc Fprat Frufa Frufib Fsang Lasius Lflav Lfuli Lnige Leptothorax Lacer Myrmica Mscab Prufe Terra</i> | Formicidae           | I glandular adaptations trophallaxis                                       | 1, 2, 3, 14, 21, 24, 39, 41          |
| <i>Myrmetes paykulli</i> Kanaar, 1979                   | * | <i>Faqui Flugu Fpoly Fprat Frufa Lasius sp.</i>                                                                                | Formicinae           | I death feigning                                                           | 1, 2, 5, 14, 19, 21, 24, 41, 45      |
| LATRIDIIDAE                                             |   |                                                                                                                                |                      |                                                                            |                                      |
| <i>Corticaria longicollis</i> (Zetterstedt, 1838)       | * | <i>Faqui Fexse Flugu Fpoly Fprat Frufa Lnige Tcaes</i>                                                                         | Formicidae           | I                                                                          | 24, 34, 39, 44                       |
| <i>Corticaria inconspicua</i> Wollaston, 1860           | * | <u>Fprat Frufa</u>                                                                                                             | <i>F. rufa</i> group | I                                                                          | 24                                   |
| MONOTOMIDAE                                             |   |                                                                                                                                |                      |                                                                            |                                      |
| <i>Monotoma angusticollis</i> (Gyllenhal, 1827)         | * | <i>Faqui Fexse Flugu Fprat Fpoly Frufa</i>                                                                                     | Formicamound         | I death feigning                                                           | 1, 5, 19, 24, 40, 41,44, 45          |
| <i>Monotoma conicicollis</i> Aubé, 1837                 | * | <i>Faqui Fexse Flugu Fpoly Fprat Frufa Fural</i>                                                                               | Formicamound         | I death feigning                                                           | 1, 5, 19, 21, 24, 39, 40, 41, 44, 45 |
| PTILIIDAE                                               |   |                                                                                                                                |                      |                                                                            |                                      |
| <i>Ptilium myrmecophilum</i> (Allibert, 1844)           | * | <i>Faqui Flugu Frufa Fprat Fsang Ftrun Lasius</i>                                                                              | Formicinae           | I                                                                          | 1, 5, 24, 39, 40, 41                 |
| <i>Ptenidium formicetorum</i> Kraatz, 1851              | * | <i>Faqui Fexse Fpoly Frufa Fprat Lbrun Lfuli</i>                                                                               | Formicinae           | I                                                                          | 1, 5, 24, 41, 44                     |
| STAPHYLINIDAE                                           |   |                                                                                                                                |                      |                                                                            |                                      |
| ALEOCHARINAE                                            |   |                                                                                                                                |                      |                                                                            |                                      |
| <i>Amidobia talpa</i> (Heer, 1841)                      | * | <i>Faqui Fexse Flugu Fpoly Fprat Frufa Ftrun Lfuli Frufa Lfuli</i>                                                             | Formicinae           | I                                                                          | 5, 19, 24, 29, 40, 44, 45            |
| <i>Atheta confusa</i> (Märkel, 1844)                    |   | <i>Faqui Fcine Fexse Ffusc Fpoly Frufib Fsang</i>                                                                              | Formicinae           | I                                                                          | 24                                   |
| <i>Dinarda dentata</i> (Gravenhorst, 1806)              |   | <i>Faqui Fcine Fexse Ffusc Fpoly Frufib Fsang</i>                                                                              | <i>Formica</i>       | I trophallaxis brood parasite                                              | 24, 29                               |
| <i>Dinarda hagensii</i> Wasmann, 1889                   |   | <b>Fexse Fprat</b>                                                                                                             | Formicamound         | I trophallaxis brood parasite                                              | 24, 37, 39                           |
| <i>Dinarda maerkelii</i> Kiesenwetter, 1843             | * | <i>Flugu Fpoly Fprat Frufa Fsang Ftrun</i>                                                                                     | <i>Formica</i>       | I trophallaxis brood parasite                                              | 1, 2, 5, 19, 24, 37, 39, 45          |
| <i>Euryusa optabilis</i> Heer, 1839                     |   | <i>Frufa Lbrun Lnige Lfuli</i>                                                                                                 | Formicinae           | I                                                                          | 24                                   |
| <i>Lomechusa emarginata</i> (Paykull, 1789)             |   | <i>Fcine Ffusc Frufa Fsang Lasius Mrubr Mrugi Mrugu Mscab Msabu Msulc</i>                                                      | Formicidae           | D glandular adaptations trophallaxis brood parasite                        | 5, 24, 37                            |
| <i>Lomechusa pubicollis</i> Brisout de Barneville, 1860 | * | <i>Ffusc Fpoly Fprat Frufa Frufib Ftrun Lfuli Lalie Lflav Lnige Lumbr Mrubr Mrugi Msulc Tcaes</i>                              | Formicidae           | D glandular adaptations trophallaxis brood parasite                        | 1, 4, 5, 11, 24, 41                  |

|                                                         |                                                                                              |                        |  |                                                         |                                          |
|---------------------------------------------------------|----------------------------------------------------------------------------------------------|------------------------|--|---------------------------------------------------------|------------------------------------------|
| <i>Lomechusoides inflatus</i> (Zetterstedt, 1828)       | ? <i>Fexse Fgaga Fprat Frufa Fural</i>                                                       | <i>Formica</i>         |  | glandular adaptations<br>trophallaxis<br>brood parasite | 24, 25                                   |
| <i>Lomechusoides sibiricus</i> Motschulsky, 1844        | <i>Frufa Fsang</i>                                                                           | <i>Formica</i>         |  | glandular adaptations<br>trophallaxis<br>brood parasite | 25                                       |
| <i>Lomechusoides strumosus</i> (Fabricius, 1792)        | <i>Fprat Frufa Fsang</i>                                                                     | <i>Formica</i>         |  | glandular adaptations<br>trophallaxis<br>brood parasite | 1,24                                     |
| <i>Lomechusoides welleni</i> (Palm, 1949)               | ? <i>Flugu Frufa Fural</i>                                                                   | Formicamound           |  | glandular adaptations<br>trophallaxis<br>brood parasite | 24                                       |
| <i>Lyprocorrhe anceps</i> (Erichson, 1837)              | * <i>Faqui Fexse Fluqu Fnigr Fpoly Fprat Frufa Ftrun Lfuli</i>                               | Formicinae             |  |                                                         | 1, 5, 19, 24, 37, 39, 40, 41, 44, 45     |
| <i>Notothecta confusa</i> (Märkel, 1844)                | <i>Frufa Lfuli</i>                                                                           | Formicinae             |  |                                                         | 24                                       |
| <i>Notothecta flavipes</i> (Gravenhorst, 1806)          | * <i>Faqui Fexse Fluqu Fpoly Fprat Frufa Fsang Ftrun Lflav</i>                               | Formicinae             |  |                                                         | 1, 5, 19, 24, 29, 37, 39, 40, 41, 44, 45 |
| <i>Oxypoda formiceticola</i> Märkel, 1841               | * <i>Faqui Fexse Ffusc Fluqu Fpoly Frufa Lasius</i>                                          | Formicinae             |  |                                                         | 24, 37, 39, 40, 41, 44                   |
| <i>Oxypoda pratensisicola</i> Lohse, 1970               | * <i>Fexse Fprat</i>                                                                         | Formicamound           |  |                                                         | 24, 37, 39                               |
| <i>Oxypoda recondita</i> Kraatz, 1856                   | <i>Frufa Fsang Lbrun</i>                                                                     | Formicinae             |  |                                                         | 5                                        |
| <i>Oxypoda rugicollis</i> Kraatz, 1856                  | <i>Fexse Fprat Fpres Frufa Lasius</i>                                                        | Formicinae             |  |                                                         | 24, 37, 39                               |
| <i>Oxypoda vittata</i> Märkel, 1842                     | <i>Frufa Lbrun Lfuli</i>                                                                     | Formicinae             |  |                                                         | 24, 29, 45                               |
| <i>Thiasophila angulata</i> (Erichson, 1837)            | * <i>Faqui Fexse Fluqu Fpoly Fprat Frufa Fsang Ftrun Fural Lbrun Lfuli</i>                   | Formicinae             |  |                                                         | 1, 5, 24, 29, 37, 40, 41, 44, 45         |
| <i>Thiasophila canaliculata</i> Mulsant and Rey, 1875   | <i>Fexse Frufa</i>                                                                           | Formicamound           |  |                                                         | 1, 24, 37, 39                            |
| <i>Thiasophila inquilina</i> Märkel, 1844               | <i>Lfuli Frufa Fprat</i>                                                                     | Formicinae             |  |                                                         | 5, 24                                    |
| <i>Thiasophila lohsei</i> Zerche, 1987                  | * <i>Fprat</i>                                                                               | <i>F. rufa</i> group   |  |                                                         | 14, 24, 37, 39                           |
| <i>Zyras (Zyras) haworthi</i> (Stephens, 1832)          | <i>Asubt Clign Frufa Lfuli</i>                                                               | Formicidae             |  |                                                         | 5                                        |
| <i>Zyras (Pella) humeralis</i> (Gravenhorst, 1802)      | <i>Faqui Fpoly Fprat Frufa Lbrun Lfuli Lumbr</i>                                             | Formicinae             |  | winter association                                      | 1, 5, 24, 29, 39, 45                     |
| PSELAPHINAE                                             |                                                                                              |                        |  |                                                         |                                          |
| <i>Batrissodes venustus</i> (Reichenbach, 1816)         | <i>Clign Ffusc Fpoly Frufa Ftrun Mscab Lbico Lbrun Lfuli Lnige</i>                           | Formicidae             |  |                                                         | 1, 5, 24, 29                             |
| SCYDMAENINAE                                            |                                                                                              |                        |  |                                                         |                                          |
| <i>Euconnus claviger</i> (P.W.J.Müller and Kunze, 1822) | <i>Clign_Ffusc Frufa Fsang Lbrun Lfuli Lnige "rufagroup"</i>                                 | Formicinae             |  |                                                         | 14, 21, 22, 42                           |
| <i>Euconnus maeklinii</i> (Mannerheim, 1844b)           | <i>Fpoly Frufa Lbrun Lfuli Lnige "rufagroup" Lasius</i>                                      | Formicinae             |  |                                                         | 1, 14, 22, 24, 42, 44                    |
| <i>Euconnus pragensis</i> Machulka, 1923                | <i>Clign Fcine Frufa Lbrun Lnige Lfuli Lasius</i>                                            | Formicinae             |  |                                                         | 14, 21, 22, 24, 42                       |
| STAPHYLININAE                                           |                                                                                              |                        |  |                                                         |                                          |
| <i>Quedius brevis</i> Erichson, 1840                    | <i>Faqui Fexse Fluqu Fpoly Frufa Fsang Lbrun Lfuli</i>                                       | Formicinae             |  | death feigning                                          | 1, 5, 19, 24, 37, 40, 39, 41, 45         |
| STENINAE                                                |                                                                                              |                        |  |                                                         |                                          |
| <i>Stenus aterrimus</i> Erichson, 1839                  | * <i>Fpoly Fprat Frufa Ftrun</i>                                                             | <i>Formica</i> s. str. |  |                                                         | 1, 2, 24, 29, 37, 39, 41, 45             |
| TACHYPORINAE                                            |                                                                                              |                        |  |                                                         |                                          |
| <i>Lamprinodes saginatus</i> (Gravenhorst, 1806)        | <i>Acanthomyops Fexse Ffusc Fpoly Frufa Fsang Lflav Lfuli Msabu Mrubr Mrugi Mscab Ponera</i> | Formicidae             |  |                                                         | 1, 5, 24, 41, 45                         |
| XANTHOLININAE                                           |                                                                                              |                        |  |                                                         |                                          |
| <i>Gyrohyphnus atratus</i> (Heer, 1839)                 | * <i>Faqui Fluqu Fpoly Fprat Frufa Lfuli Mrubr</i>                                           | Formicidae             |  |                                                         | 1, 5, 19, 24, 29, 40, 41, 44             |

|                                                     |   |                                                                                                                                                              |                      |                  |                                      |
|-----------------------------------------------------|---|--------------------------------------------------------------------------------------------------------------------------------------------------------------|----------------------|------------------|--------------------------------------|
| <i>Leptacinus formicetorum</i> Märkel, 1841         | * | <u>Faqui</u> <u>Fexse</u> <u>Flugu</u> <u>Fpoly</u> <u>Fprat</u> <u>Frufa</u> <u>Frufib</u> <u>Fural</u> <u>Lbrun</u>                                        | Formicinae           | I                | 1, 5, 19, 24, 37, 39, 40, 41, 44, 45 |
| <b>TENEBRIONIDAE</b>                                |   |                                                                                                                                                              |                      |                  |                                      |
| <i>Myrmexchixenus subterraneus</i> Chevrolat, 1835  | * | <u>Faqui</u> <u>Fcine</u> <u>Fexse</u> <u>Ffusca</u> <u>Flugu</u> <u>Fprat</u> <u>Fpres</u> <u>Fpoly</u> <u>Frufa</u> <u>Ftrun</u> <u>Lnige</u> <u>Lfuli</u> | Formicinae           | I                | 1, 14, 19, 24, 39, 41, 44            |
| <b>DIPTERA</b>                                      |   |                                                                                                                                                              |                      |                  |                                      |
| <b>CHIRONOMIDAE</b>                                 |   |                                                                                                                                                              |                      |                  |                                      |
| <i>Forcipomyia myrmecophila</i> (Egger, 1863)       | ? | <u>Fexse</u> <u>Frufa</u>                                                                                                                                    | Formicamound         | A                | 5, 19, 41                            |
| <b>MILICHIIDAE</b>                                  |   |                                                                                                                                                              |                      |                  |                                      |
| <i>Phyllomyza formicae</i> Schmitz, 1923            | * | <u>Flugu</u> <u>Frufa</u> <u>Fprat</u>                                                                                                                       | <i>F. rufa</i> group | A                | 5, 19                                |
| <b>MYTHICOMYIIDAE</b>                               |   |                                                                                                                                                              |                      |                  |                                      |
| <i>Glbellula arctica</i> (Zetterstedt, 1838)        | ? | <u>Faqui</u> <u>Fexse</u> <u>Fpoly</u> <u>Fprat</u>                                                                                                          | Formicamound         | A                | 14b, 44                              |
| <b>SCATOPSIDAE</b>                                  |   |                                                                                                                                                              |                      |                  |                                      |
| <i>Colobostema infumatum</i> (Haliday, 1833)        |   | <u>Lfuli</u> <u>Frufa</u>                                                                                                                                    | Formicinae           |                  | 5                                    |
| <i>Colobostema nigripenne</i> (Meigen, 1830)        |   | <u>Myrmica</u> <u>RWA</u>                                                                                                                                    | Formicidae           | ?                | 19, 43                               |
| <i>Holoplagia transversalis</i> (Loew, 1846)        |   | <u>Lfuli</u> <u>Frufa</u>                                                                                                                                    | Formicinae           | A                | 5                                    |
| <i>Scatopse leucopeza</i> Meigen, 1818              |   | <u>Frufa</u> <u>Lbrun</u> <u>Lfuli</u>                                                                                                                       | Formicinae           | ?                | 1                                    |
| <b>SYRPHIDAE</b>                                    |   |                                                                                                                                                              |                      |                  |                                      |
| <i>Microdon mutabilis</i> (Linnaeus, 1758)          |   | <u>Ffusc</u> <u>Flema</u> <u>Frufa</u> <u>Frufib</u> <u>Lnige</u> <u>Lbrun</u> <u>Lflav</u>                                                                  | Formicinae           | A brood parasite | 1, 2, 5, 35                          |
| <i>Microdon devius</i> (Linnaeus, 1761)             |   | <u>Ffusc</u> <u>Frufa</u> <u>Fsang</u> <u>Lflav</u> <u>Lfuli</u>                                                                                             | Formicinae           | A brood parasite | 1, 5                                 |
| <i>Microdon analis</i> (Macquart, 1842)             |   | <u>Fexse</u> <u>Ffusc</u> <u>Flema</u> <u>Frufa</u> <u>Fsang</u> <u>Lfuli</u>                                                                                | Formicinae           | A brood parasite | 30                                   |
| <b>HEMIPTERA</b>                                    |   |                                                                                                                                                              |                      |                  |                                      |
| <b>ALYDIDAE</b>                                     |   |                                                                                                                                                              |                      |                  |                                      |
| <i>Alydus calcaratus</i> (Linnaeus, 1758)           |   | <u>Ffusc</u> <u>Fprat</u> <u>Frufa</u> <u>Frufib</u> <u>Fsang</u> <u>Lflav</u> <u>Lnige</u> <u>Myrmica</u> <u>Mrubr</u>                                      | Formicidae           | E mimicry        | 1, 2, 5, 28                          |
| <b>ANTHOCORIDAE</b>                                 |   |                                                                                                                                                              |                      |                  |                                      |
| <i>Xylocoris formicetorum</i> (Boheman, 1844)       | * | <u>Fexse</u> <u>Ffusc</u> <u>Flugu</u> <u>Fpoly</u> <u>Fprat</u> <u>Frufa</u> <u>Fsang</u> <u>Ftrun</u> <u>Lflav</u>                                         | Formicidae           | I                | 2, 19, 23b, 28, 41, 44               |
| <b>LYGAEIDAE</b>                                    |   |                                                                                                                                                              |                      |                  |                                      |
| <i>Notochilus limbatus</i> Fieber, 1870             |   | <u>Frufa</u> <u>Myrmica</u>                                                                                                                                  | Formicidae           | I                | 1, 28                                |
| <i>Eremocoris abietis</i> (Linnaeus, 1758)          | * | <u>Frufa</u> <u>Camponotus</u>                                                                                                                               | Formicinae           | E                | 1, 28, 41                            |
| <b>MIRIDAE</b>                                      |   |                                                                                                                                                              |                      |                  |                                      |
| <i>Myrmecoris gracilis</i> (R.F. Sahlberg, 1848)    |   | <u>Ffusc</u> <u>Frufa</u> <u>Lnige</u>                                                                                                                       | Formicinae           | E mimicry        | 1, 5, 28                             |
| <i>Pilophorus cinnamopterus</i> (Kirschbaum, 1856)  | * | <u>Fprat</u> <u>Frufa</u>                                                                                                                                    | <i>F. rufa</i> group | E mimicry        | 1, 5, 28                             |
| <i>Pilophorus perplexus</i> Douglas and Scott, 1875 |   | <u>Ffusc</u> <u>Frufa</u> <u>Fsang</u> <u>Lbrun</u> <u>Lemar</u> <u>Lfuli</u> <u>Lnige</u>                                                                   | Formicinae           | E mimicry        | 5, 28, 43                            |
| <b>HYMENOPTERA</b>                                  |   |                                                                                                                                                              |                      |                  |                                      |
| <b>BRACONIDAE</b>                                   |   |                                                                                                                                                              |                      |                  |                                      |
| <i>Elasmosoma berlinense</i> Ruthe, 1858            |   | <u>Camponotus</u> <u>Cvagus</u> <u>Ffusc</u> <u>Fjapo</u> <u>Fprat</u> <u>Frufa</u> <u>Fsang</u> <u>Formica</u> <u>Lnige</u> <u>Polyergus</u>                | Formicinae           | P ant parasite   | 1, 3, 5, 36                          |
| <i>Fachylomma [Eurijpterna] creinierl</i>           |   | <u>Lfuli</u> <u>Frufa</u>                                                                                                                                    | Formicinae           | ?                | 3                                    |
| <i>Neoneurus auctus</i> (Thomson, 1895)             | * | <u>Frufa</u> <u>Fprat</u>                                                                                                                                    | <i>F. rufa</i> group | P ant parasite   | 36                                   |
| <i>Neoneurus clypeatus</i> (Förster, 1862)          | * | <u>Frufa</u>                                                                                                                                                 | <i>F. rufa</i> group | P ant parasite   | 36                                   |
| <i>Kollasmosoma marikovskii</i> (Tobias, 1986)      | * | <u>Fprat</u>                                                                                                                                                 | <i>F. rufa</i> group | P ant parasite   | 36                                   |
| <b>DIAPRIIDAE</b>                                   |   |                                                                                                                                                              |                      |                  |                                      |
| <i>Trichopria fuliginosa</i> (Wasmann, 1899)        |   | <u>Frufa</u> <u>Lfuli</u>                                                                                                                                    | Formicinae           | I                | 5                                    |
| <b>EUCHARITIDAE</b>                                 |   |                                                                                                                                                              |                      |                  |                                      |

|                                                  |                                                                                                                                                                                                            |                      |                                               |                         |
|--------------------------------------------------|------------------------------------------------------------------------------------------------------------------------------------------------------------------------------------------------------------|----------------------|-----------------------------------------------|-------------------------|
| <i>Chalcura</i> sp.                              | * <u><i>Frufa</i></u>                                                                                                                                                                                      | <i>F. rufa</i> group | P ant parasite                                | 1, 5, 36                |
| <i>Eucharis bedeli</i> (Cameron, 1891)           | <i>Cataglyphis Fjapo</i> <u><i>Frufa</i></u>                                                                                                                                                               | Formicinae           | P ant parasite                                | 36                      |
| <i>Eucharis adscendens</i> (Fabricius, 1787)     | <u><i>Frufa</i></u> <i>Fcuni</i> <i>Messor</i>                                                                                                                                                             | Formicidae           | P ant parasite                                | 36                      |
| <b>FORMICIDAE</b>                                |                                                                                                                                                                                                            |                      |                                               |                         |
| <i>Formicoxenus nitidulus</i> (Nylander, 1846)   | * <u><i>Faqui</i></u> <i>Fexse</i> <u><i>Flugu</i></u> <u><i>Epoly</i></u> <u><i>Fprat</i></u> <i>Fpres</i> <u><i>Frufa</i></u> <i>Fsang</i> <i>Ftrun</i>                                                  | Formicamound         | I xenobiosis with chemical deterrent strategy | 1, 2, 5, 27, 41, 44, 45 |
| <i>Solenopsis fugax</i> (Latreille, 1798)        | <i>Fural</i><br><i>Fcine</i> <i>Fcuni</i> <i>Ffusc</i> <u><i>Fprat</i></u> <u><i>Frufa</i></u> <i>Frufib</i> <i>Fsang</i> <i>Lflav</i> <i>Lmixt</i><br><i>Lnige</i> <i>Mscab</i> <i>Prufe</i> <i>Tcaes</i> | Formicidae           | I lestopobiosis                               | 2, 5                    |
| <b>ICHNEUMONIDAE</b>                             |                                                                                                                                                                                                            |                      |                                               |                         |
| <i>Hybrizon buccatus</i> (de Brébisson, 1825)    | <i>Formica</i> <u><i>Fprat</i></u> <u><i>Frufa</i></u> <i>Lasius</i> <i>Myrmica</i> <i>Tapinoma</i>                                                                                                        | Formicidae           | P ant parasite                                | 5, 36                   |
| <i>Eurypterna cremeri</i> (Romand, 1838)         | <u><i>Frufa</i></u> <i>Lasius</i>                                                                                                                                                                          | Formicinae           | P ant parasite                                | 36                      |
| <b>MEGASPILIDAE</b>                              |                                                                                                                                                                                                            |                      |                                               |                         |
| <i>Conostigmus inquilinus</i> (Erichson, 1844)   | * <u><i>Frufa</i></u>                                                                                                                                                                                      | <i>F. rufa</i> group | ?                                             | 1                       |
| <i>Conostigmus formiceti</i> (Erichson, 1844)    | * <u><i>Frufa</i></u>                                                                                                                                                                                      | <i>F. rufa</i> group | I                                             | 1, 5                    |
| <b>LEPIDOPTERA</b>                               |                                                                                                                                                                                                            |                      |                                               |                         |
| <b>TINEIDAE</b>                                  |                                                                                                                                                                                                            |                      |                                               |                         |
| <i>Myrmecozela ochraceella</i> (Tengström, 1848) | * <u><i>Flugu</i></u> <u><i>Fprat</i></u> <u><i>Frufa</i></u>                                                                                                                                              | <i>F. rufa</i> group | A larva in case                               | 1, 5                    |
| <b>ORTHOPTERA</b>                                |                                                                                                                                                                                                            |                      |                                               |                         |
| <b>MYRMECOPHILIDAE</b>                           |                                                                                                                                                                                                            |                      |                                               |                         |
| <i>Myrmecophilus acervorum</i> (Panzer, 1799)    | Panmyrmecophilous                                                                                                                                                                                          | Formicidae           | I trophallaxis                                | 1, 2, 8, 23             |

1 = (Wasmann, 1894), 2 = (Janet, 1897), 3 = (Wasmann, 1898), 4 = (Wasmann, 1899), 5 = (Donisthorpe, 1927), 6 = (Štorkán, 1940), 7 = (Brooks, 1942), 8 = (Chopard, 1951), 9 = (Karafiat, 1959), 10 = (Evans and Till, 1966), 11 = (Hölldobler, 1967), 12 = (Mahunka, 1967), 13 = (Mahunka, 1970), 14 = (Freude et al., 1974), 14b = (Andersson, 1974), 15 = (Ebermann, 1980), 16 = (Fain and Chmielewski, 1987), 17 = (Lehtinen, 1987), 18 = (Gösswald, 1989), 19 = (Fowles, 1994), 20 = (Simon, 1997), 21 = (Hlavac and Lackner, 1998), 22 = (O'Keefe, 2000), 23 = (Junker and Ratschker, 2000), 23b = (Lapeva and Simov, 2000), 24 = (Päivinen et al., 2003), 25 = (Hlavac, 2005), 26 = (Dekoninck et al., 2007), 27 = (Seifert, 2007), 28 = (Wachmann et al., 2007), 29 = (Staniec and Zagaja, 2008), 30 = (Reemer et al., 2009), 31 = (Huhta and Karg, 2010), 32 = (Uppstrom, 2010), 33 = (Davidson, 2011), 34 = (Lapeva-Gjonova and Rücker, 2011), 35 = (Hovestadt et al., 2012), 36 = (Lachaud and Pérez-Lachaud, 2012), 37 = (Lapeva-Gjonova and Lieff, 2012), 38 = (Renneson et al., 2012), 39 = (Lapeva-Gjonova, 2013), 40 = (Robinson and Robinson, 2013), 41 = (Boer, 2013), 42 = (Tykarski et al., 2013), 43 = (Storey, 2014), 44 = (Härkönen and Sorvari, 2014), 45 = pers.l obs. TP and/or unpub. data



|                                |                                       |               |
|--------------------------------|---------------------------------------|---------------|
| <i>Myrmica</i> Latreille, 1804 | <i>M. capitatus</i> (Latreille, 1798) | <i>MScapi</i> |
|                                | <i>M. rubra</i> (Linnaeus, 1758)      | <i>Mrubr</i>  |
|                                | <i>M. ruginodis</i> Nylander, 1846    | <i>Mrugi</i>  |
|                                | <i>M. rugulosa</i> Nylander, 1842     | <i>Mrugu</i>  |
|                                | <i>M. sabuleti</i> Meinert, 1861      | <i>Msabu</i>  |
|                                | <i>M. scabrinodis</i> Nylander, 1846  | <i>Mscab</i>  |
|                                | <i>M. sulcinodis</i> Nylander, 1846   | <i>Msulc</i>  |
|                                | <i>P. pallidula</i> Westwood, 1840,   | <i>Ppall</i>  |
|                                | <i>S. fugax</i> Latreille, 1798       | <i>Sfuga</i>  |
|                                | <i>T. caespitum</i> (Linnaeus, 1758)  | <i>Tcaes</i>  |
| <i>Pheidole</i>                |                                       |               |
| <i>Solenopsis</i>              |                                       |               |
| <i>Tetramorium</i> Mayr, 1855  |                                       |               |

**Supplementary Table 3. Myrmecophiles associated with other mound building Eurasian wood ants and not recorded with RWAs.**

| Myrmecophile                                  | Host ant                                                     | Taxonomic relation host ants | References |
|-----------------------------------------------|--------------------------------------------------------------|------------------------------|------------|
| <i>Thiasophila bercionis</i> Bernhauer, 1926  | <b>Fexse</b> <i>Fural</i>                                    | Formicamound                 | 24         |
| <i>Zyras cognatus</i> (Märkel, 1842)          | <i>Ffusc Fexse Lbrun Lnige Lfuli</i>                         | Formicinae                   | 24         |
| <i>Zyras limbatus</i> (Paykull, 1789)         | <i>Ffusc Fsang Fexse Lfuli Lflav Lbrun Lnige Mrubr Mscab</i> | Formicidae                   | 24         |
| <i>Rhyncholophus phalangoides</i> Moniez 1894 | <b>Fexse</b>                                                 | <i>Coptoformica</i>          | 32         |
| <i>Micaria pulicaria</i> (Sundevall, 1831)    | <i>Fcuni Fexse Ffusc Fsang Lfuli Lnige Lumbr Tcaes</i>       | Formicidae                   | 5          |
